1 **Title: Intrinsic maturation of sleep output neurons regulates sleep ontogeny in**

2 ***Drosophila***

3

4 **Authors:** Naihua N. Gong<sup>1</sup>, An H. Dang<sup>1</sup>, Benjamin Mainwaring<sup>1</sup>, Emily Shields<sup>2,3</sup>, Karl

5 Schmeckpeper<sup>4</sup>, Roberto Bonasio<sup>3</sup>, Matthew S. Kayser<sup>1,5,6\*</sup>

6

7 **Affiliations:**

8 <sup>1</sup> Department of Psychiatry, Perelman School of Medicine at the University of

9 Pennsylvania, Philadelphia, Pennsylvania 19104

10 <sup>2</sup> Department of Urology and Institute of Neuropathology, Medical Center-University of

11 Freiburg, 79106 Freiburg, Germany

12 <sup>3</sup> Epigenetics Institute and Department of Cell and Developmental Biology, Perelman

13 School of Medicine at the University of Pennsylvania, Philadelphia, Pennsylvania 19104

14 <sup>4</sup> Department of Computer Science, University of Pennsylvania, Philadelphia,

15 Pennsylvania 19104

16 <sup>5</sup> Department of Neuroscience, Perelman School of Medicine at the University of

17 Pennsylvania, Philadelphia, Pennsylvania 19104

18 <sup>6</sup> Chronobiology and Sleep Institute, Perelman School of Medicine at the University of

19 Pennsylvania, Philadelphia, Pennsylvania 19104

20

21 \*Correspondence to: [kayser@pennmedicine.upenn.edu](mailto:kayser@pennmedicine.upenn.edu)

22

23

## 24 **Abstract**

25 The maturation of sleep behavior across a lifespan (sleep ontogeny) is an evolutionarily  
26 conserved phenomenon. Mammalian studies have shown that in addition to increased  
27 sleep duration, early life sleep exhibits stark differences compared to mature sleep with  
28 regard to the amount of time spent in certain sleep states. How intrinsic maturation of  
29 sleep output circuits contributes to sleep ontogeny is poorly understood. The fruit fly  
30 *Drosophila melanogaster* exhibits multifaceted changes to sleep from juvenile to mature  
31 adulthood. Here, we use a non-invasive probabilistic approach to investigate changes in  
32 sleep architecture in juvenile and mature flies. Increased sleep in juvenile flies is driven  
33 primarily by a decreased probability of transitioning to wake, and characterized by more  
34 time in deeper sleep states. Functional manipulations of sleep-promoting neurons in the  
35 dFB suggest these neurons differentially regulate sleep in juvenile and mature flies.  
36 Transcriptomic analysis of dFB neurons at different ages and a subsequent RNAi  
37 screen implicate genes involved in distinct molecular processes in sleep control of  
38 juvenile and mature flies. These results reveal that dynamic transcriptional states of  
39 sleep output neurons contribute to changes in sleep across the lifespan.

40

## 41 **Introduction**

42 Across species, sleep duration peaks in early life and declines with age (Jouvet-  
43 Mounier et al., 1969; Kayser and Biron, 2016; Roffwarg et al., 1966). Early life sleep is  
44 also characterized by differences in sleep architecture compared to maturity. For  
45 example, in humans, sleep duration as well as percentage of time spent in rapid eye  
46 movement (REM) sleep is highest in newborn infants and decreases with age (Roffwarg

47 et al., 1966). Several lines of evidence point towards the importance of early life sleep  
48 for normal neurodevelopment (Blumberg, 2015; Cao et al., 2020; Frank et al., 2001;  
49 Jones et al., 2019; Kayser et al., 2014; Marks et al., 1995; Seugnet et al., 2011).  
50 Juvenile sleep may thus have characteristics that fulfill specific needs for nervous  
51 system development. However, mechanisms underlying sleep ontogeny -- the change  
52 in sleep features across development -- are largely unknown.

53 At a fundamental level, the probability of transitioning between sleep and wake  
54 influence sleep duration. These transitions are controlled by an interplay between sleep  
55 regulatory neural substrates (Artiushin and Sehgal, 2017; Eban-Rothschild et al., 2018;  
56 Scammell et al., 2017). In addition, both mammals and invertebrates such as  
57 *Drosophila melanogaster* exhibit transitions between distinct sleep stages, which are  
58 defined by electrophysiologic and behavioral measurements (Blake and Gerard, 1937;  
59 Clancy et al., 1978; Lendner et al., 2020; Nitz et al., 2002; Tainton-Heap et al., 2021;  
60 Weber, 2017; Yamabe et al., 2019; Yap et al., 2017). In *Drosophila*, conditional  
61 probabilities of activity/inactivity state transitions as well as hidden Markov modeling of  
62 sleep/wake substates have proven to be useful, non-invasive methods for probing the  
63 neurobiology underlying sleep architecture (Wiggin et al., 2020). Using such  
64 approaches towards a detailed analysis of sleep/wake transitions and sleep states in  
65 juvenile flies has yet to be explored.

66 How does the development of sleep-regulatory circuits influence changes to  
67 sleep architecture across the lifespan? In flies, maturation of a key sleep circuit in the  
68 central complex of the brain contributes to sleep ontogenetic changes. Specifically,  
69 juvenile flies exhibit increased activity in sleep-promoting neurons of the dorsal fan-

70 shaped body (dFB) compared to mature flies (Kayser et al., 2014). One factor governing  
71 this change in sleep output is the maturation of dopaminergic (DA) inputs that inhibit  
72 dFB activity (Liu et al., 2012; Pimentel et al., 2016; Ueno et al., 2012). These DA inputs  
73 are both less numerous and less active in juvenile flies, leading to increased dFB  
74 activity compared to mature flies (Chakravarti Dilley et al., 2020; Kayser et al., 2014).  
75 However, whether sleep-promoting dFB neurons themselves also undergo intrinsic  
76 maturation is unknown.

77       Using a conditional probabilities approach applied to locomotor measurements  
78 and hidden Markov modeling of sleep/wake substates (Wiggin et al., 2020), we  
79 addressed the question of how sleep architecture differs between juvenile and mature  
80 *Drosophila*. We find excess sleep in juvenile flies is driven primarily by a decreased  
81 probability of flies transitioning out of sleep. Juvenile flies additionally spend  
82 proportionally more time in a deep sleep state compared to mature flies. Activation in  
83 mature flies of sleep-promoting neurons defined by *R23E10-GAL4* increases sleep  
84 duration, but yields sleep architecture distinct from the juvenile sleep state. Conversely,  
85 inhibition of the same dFB neurons in juvenile flies does not result in mature fly sleep  
86 architecture. Finally, we find the dFB exhibits distinct molecular signatures across the  
87 period of sleep maturation, supporting the idea of an evolving role for the dFB across  
88 development. Our results suggest that intrinsic maturation of sleep-output neurons  
89 contributes to sleep ontogenetic changes.

90

## 91 **Results**

92 *Juvenile flies exhibit increased deep sleep compared to mature flies*



93 To investigate how sleep/wake transition probabilities differ between juvenile (1  
94 day post-eclosion) and mature (5-7 days post-eclosion) adult flies, we recorded sleep in  
95 *iso31* female flies using a high-resolution multibeam *Drosophila* Activity Monitoring  
96 (DAM) system. Consistent with previous studies (Dilley et al., 2018; Kayser et al., 2014;  
97 Shaw et al., 2000), we observed greater sleep duration both during the day (ZT0-12)  
98 and night (ZT12-24) in juvenile flies compared to mature flies (**Fig 1A**).  $P(\text{wake})$  is  
99 defined as the probability of transitioning from an inactive to an active state, while  
100  $P(\text{doze})$  is the probability of transitioning from an active to inactive state (Wiggin et al.,  
101 2020).  $P(\text{wake})$  was significantly decreased during the day and the night in juvenile flies  
102 (**Fig 1B**), suggesting that increased sleep duration in juvenile flies is driven primarily by  
103 a lower probability of transitioning from sleep to wake.  $P(\text{doze})$  was also decreased in  
104 juvenile flies across the day and night (**Fig 1C**). Previous work has established that  
105  $P(\text{doze})$  is less closely correlated with sleep duration than  $P(\text{wake})$  (Wiggin et al., 2020),  
106 consistent with our observation that  $P(\text{wake})$  is decreased in juvenile flies and drives  
107 increased sleep duration. We noted more variance in  $P(\text{doze})$  in juvenile flies compared  
108 to mature when measured during 30-minute windows (**Fig S1**), likely because young  
109 flies spend so much time asleep that transitioning from wake to sleep is a relatively rare  
110 event over this short period of time. A larger 12-hour window (**Fig 1C, right**) more  
111 accurately assesses  $P(\text{doze})$ , especially in juvenile flies.

112 Next, we asked how sleep/wake stages differ between juvenile and mature flies.  
113 In the presence of an arousing stimulus during sleep, juvenile flies are less likely to  
114 wake compared to their mature counterparts (Kayser et al., 2014). In *Drosophila*, an  
115 increased arousal threshold is indicative of a deeper sleep state (Wiggin et al., 2020),

116 but the proportion of time spent in specific sleep states across the lifespan is unknown.  
117 Locomotor recording followed by hidden Markov modeling has been successfully used  
118 as a non-invasive method to establish physiologically-relevant sleep/wake substates  
119 from DAM system activity measurements (Wiggin et al., 2020). We trained two hidden  
120 Markov models (HMMs) with four hidden substates (deep sleep, light sleep, light wake,  
121 and full wake) using activity measurements from mature or juvenile *iso31* flies (**Table**  
122 **S1**). To determine whether transition and emission probabilities of the HMMs trained on  
123 mature and juvenile datasets (HMM-old and HMM-young) differed, we calculated the  
124 probability that HMM-old or HMM-young exactly fit observed activity patterns of each fly.  
125 For both juvenile and mature fly datasets, HMM-old and HMM-young each yielded  
126 significantly different probabilities (**Fig S2A-B**), suggesting the characteristics of defined  
127 sleep/wake substates are dynamic across the lifespan. Applying HMM-old and HMM-  
128 young to the datasets yielded minor differences in the proportion of time spent in each  
129 of the four substates for both mature and juvenile flies. Despite these distinctions, the  
130 trends in substate differences between mature and juvenile flies were the same  
131 regardless of the model used (**Fig S2C-F**), showing either model can be generally  
132 applied to observe biologically-relevant differences in sleep states between juvenile and  
133 mature flies.

134 We applied the HMM trained on mature fly activity to determine the proportion of  
135 time juvenile and mature flies spent in each of the four substates (**Fig 1D**). Compared to  
136 mature flies, juvenile flies spent significantly more time in deep sleep across both the  
137 day and night. This proportional increase came at the expense of light sleep, light wake,  
138 and full wake (**Fig 1E**). Thus, the propensity for juvenile flies to spend more time in a

139 less-arousable deep sleep state may explain the lower probability of transitioning from  
 140 sleep to wake.

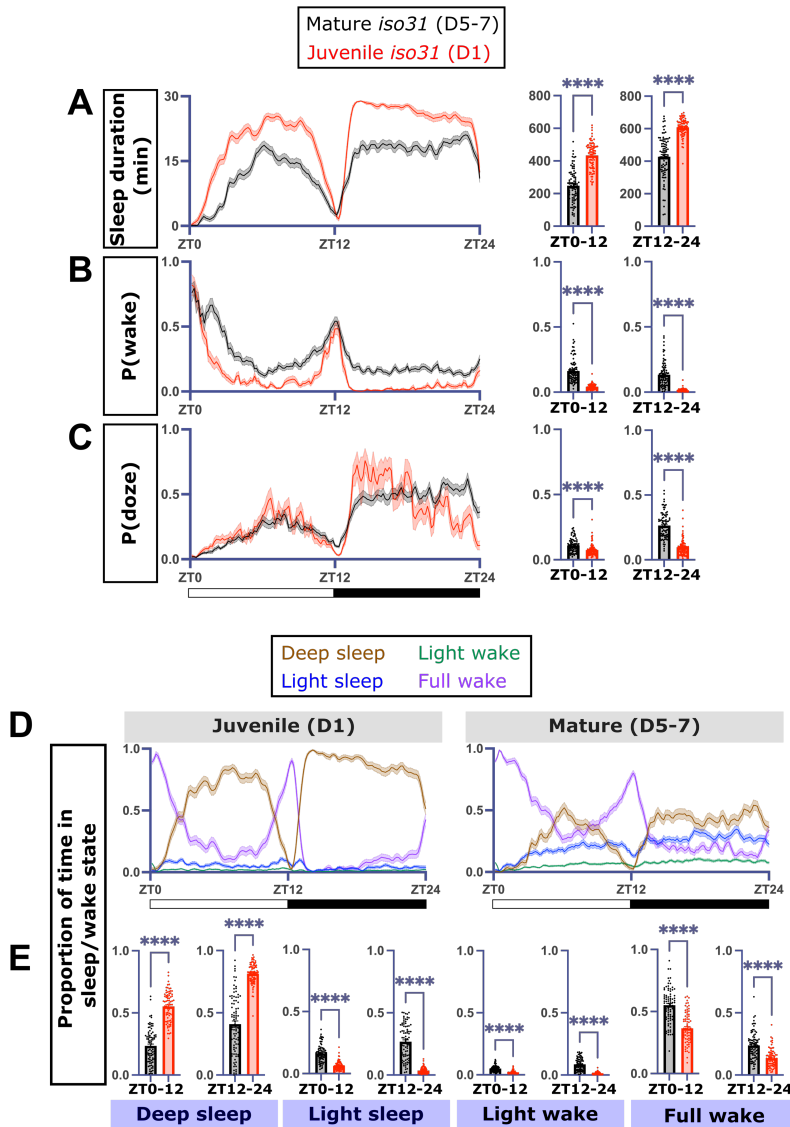

**Fig 1: Excess sleep in juvenile flies is characterized by increased deep sleep driven by a decreased probability of transitioning from sleep to wake.** A) Sleep duration, B) P(wake), and C) P(doze) in mature (black, n = 87) vs juvenile (red, n = 82) *iso31* flies. Left: sleep metric traces. Right: Quantification of sleep metrics across the lights-on (ZT0-12) or lights-off (ZT12-24) periods. D) Deep sleep (brown), light sleep (blue), light wake (green), and full wake (purple) traces in juvenile (left) and mature (right) *iso31* flies. E) Quantification of proportion of time spent in each sleep stage across the lights-on or lights-off periods (two-tailed T-tests for A-E). For this and all subsequent figures, sleep metric traces are generated from a rolling 30-minute window sampled every 10 minutes unless otherwise specified. For graphs in this figure and all other graphs unless otherwise specified, data are presented as mean  $\pm$  SEM. \* $P < 0.01$ , \*\* $P < 0.01$ , \*\*\* $P < 0.001$ , \*\*\*\* $P < 0.0001$ .

| HMM fit to D5-7 fly locomotor activity: |             |                |             |            |           |                       |             |      |      |
|-----------------------------------------|-------------|----------------|-------------|------------|-----------|-----------------------|-------------|------|------|
|                                         |             | Transition to: |             |            |           | Emission probability: |             |      |      |
| State                                   |             | Deep sleep     | Light sleep | Light wake | Full wake | Inactivity            | Activity    |      |      |
| Transition from:                        | Deep sleep  | 0.96           | 0.00        | 0.04       | 0.00      | State:                | Deep sleep  | 1.00 | 0.00 |
|                                         | Light sleep | 0.07           | 0.72        | 0.21       | 0.00      |                       | Light sleep | 1.00 | 0.00 |
|                                         | Light wake  | 0.00           | 0.43        | 0.24       | 0.32      |                       | Light wake  | 0.01 | 0.99 |
|                                         | Full wake   | 0.00           | 0.07        | 0.00       | 0.93      |                       | Full wake   | 0.04 | 0.96 |

| HMM fit to D1 fly locomotor activity: |             |                |             |            |           |                       |             |      |      |
|---------------------------------------|-------------|----------------|-------------|------------|-----------|-----------------------|-------------|------|------|
|                                       |             | Transition to: |             |            |           | Emission probability: |             |      |      |
| State                                 |             | Deep sleep     | Light sleep | Light wake | Full wake | Inactivity            | Activity    |      |      |
| Transition from:                      | Deep sleep  | 0.99           | 0.00        | 0.01       | 0.00      | State:                | Deep sleep  | 1.00 | 0.00 |
|                                       | Light sleep | 0.31           | 0.51        | 0.18       | 0.00      |                       | Light sleep | 1.00 | 0.00 |
|                                       | Light wake  | 0.00           | 0.28        | 0.18       | 0.54      |                       | Light wake  | 0.00 | 1.00 |
|                                       | Full wake   | 0.00           | 0.03        | 0.00       | 0.97      |                       | Full wake   | 0.02 | 0.98 |

**Table S1:** Transition probabilities between hidden states and emission probabilities from each hidden state to observed states for HMM trained on mature (top) and juvenile (bottom) *iso31* fly locomotor data collected using the DAM5H multibeam system. HMMs were trained on transitions from each fly (n = 87 for mature flies, n = 82 for juvenile flies; total 1439 transitions per fly per 24 hours).

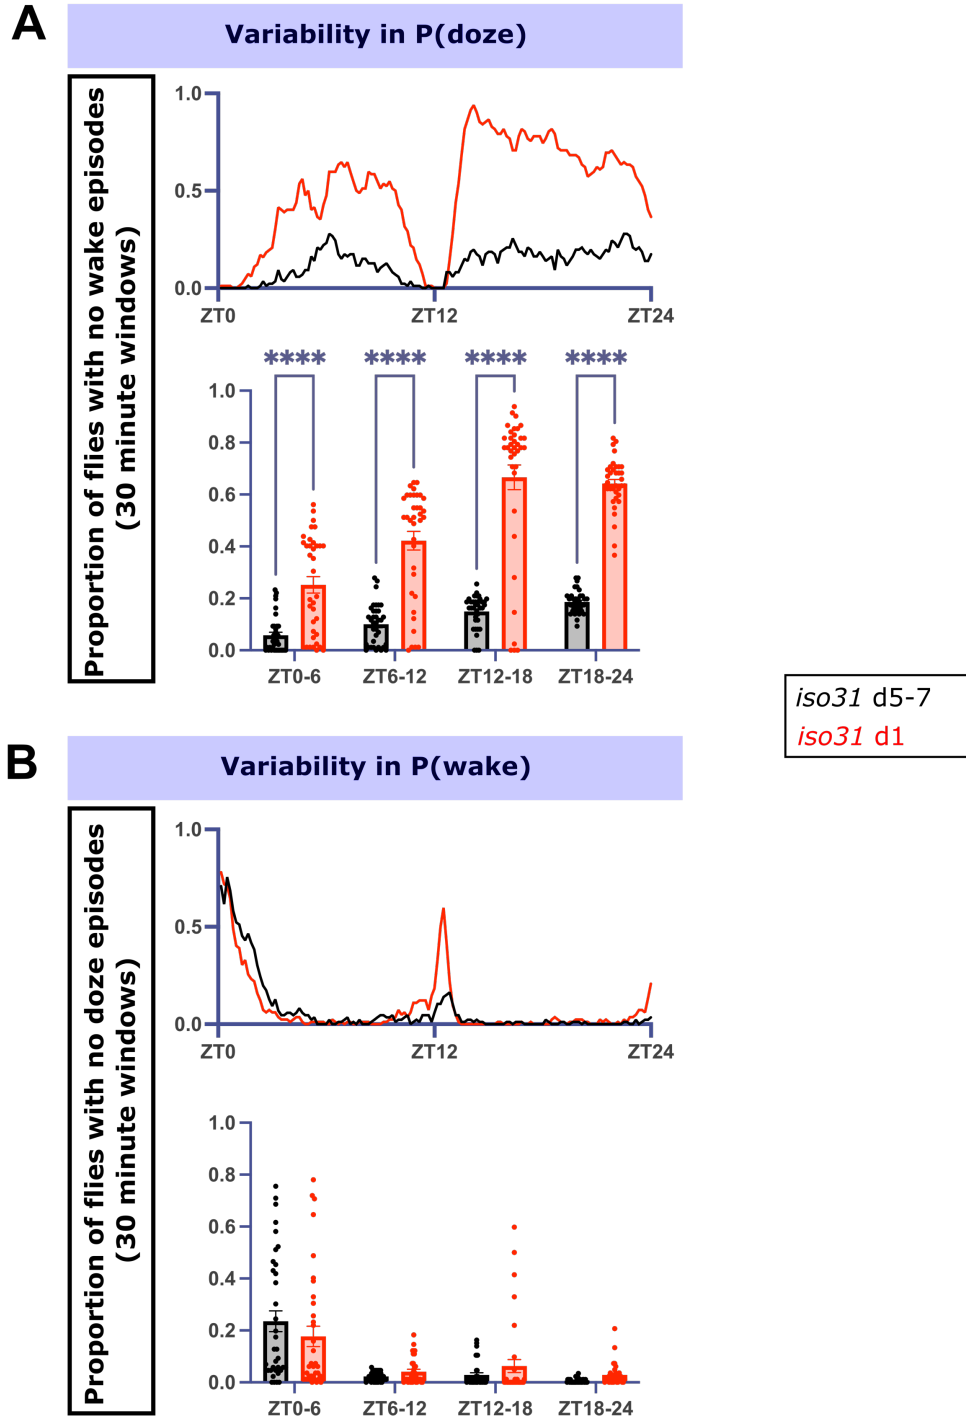

**Fig S1: Increased variance in 30-minute windows of P(doze) in juvenile flies compared to mature flies.** Proportion of undefined A) P(doze) and B) P(wake) values across 24 hours in mature (black, n = 87) and juvenile (red, n = 82) flies shown in Figure 1. Top traces are a rolling 30-minute window sampled every 10 minutes, Bottom graphs show the average proportion of undefined values per 30-minute window across 6-hour intervals.

143

144

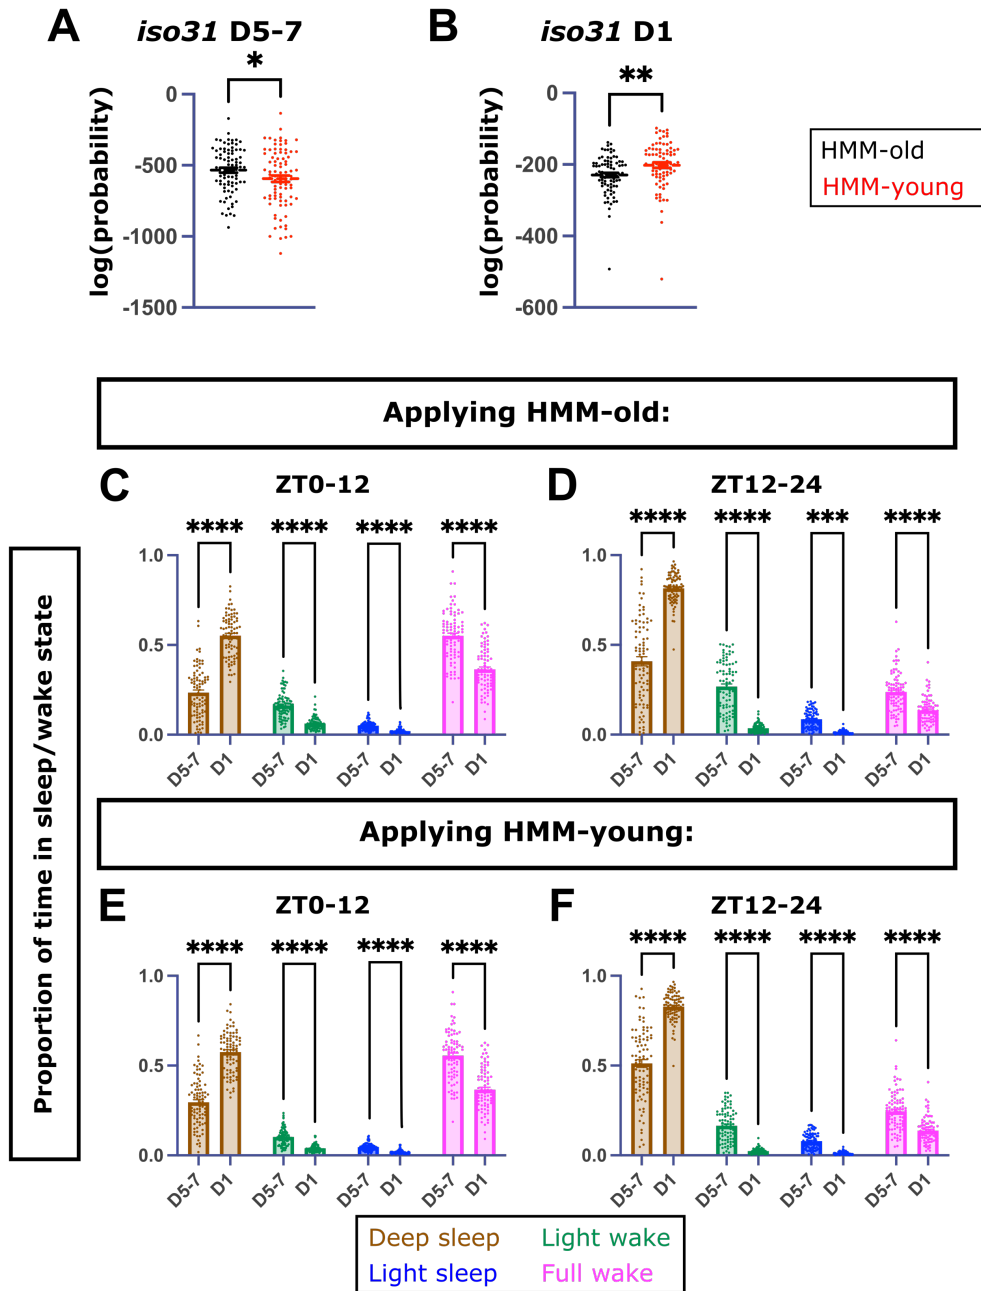

**Fig S2: HMMs trained on mature vs juvenile *iso31* fly locomotor datasets have significantly different characteristics.** Log(probability) of observing a given sequence of locomotor behavior in A) mature or B) juvenile *iso31* flies by applying HMM-old (black, n = 87) or HMM-young (red, n = 82) (two-tailed T-tests). Proportion of time spent in each sleep/wake hidden state in mature vs juvenile flies from ZT0-12 and ZT12-24 when applying C, D) HMM-old or E, F) HMM-young (two-way ANOVA with post-hoc Sidak's multiple comparison test).

145 *The juvenile sleep state is distinct from rebound sleep in deprived mature flies*

146 Our data show that juvenile flies exhibit decreased P(doze) (**Fig 1C**). This  
147 change is distinct from previous studies of rebound sleep in mature flies after  
148 deprivation, which is characterized by increased P(doze) (Wiggin et al., 2020). To test  
149 this distinction directly, we mechanically sleep deprived mature *iso31* flies from ZT12-  
150 24, and recorded rebound sleep during ZT0-12 (**Fig 2A**). Deprived mature flies slept  
151 significantly more than control mature flies and juvenile flies until ZT6-12, when sleep  
152 duration tapered off to non-deprived mature fly levels (**Fig 2B**). P(wake) in rebounding  
153 mature flies was significantly decreased compared to control mature flies from ZT0-6  
154 (**Fig 2C**), while P(doze) was increased during ZT0-9 compared to mature controls. Of  
155 note, even though sleep duration in deprived mature flies and juvenile flies was  
156 comparable around ZT3-9 (**Fig 2B**), P(doze) in deprived mature flies remained elevated  
157 across the entire ZT0-12 period compared to juvenile flies (**Fig 2D**). Finally, we  
158 assessed sleep substates (**Fig 2E-H**) and found deep sleep was significantly increased  
159 in rebounding mature flies, although the deep sleep changes did not persist across the  
160 entire day as in juvenile flies (**Fig 2E**). These results support the idea that juvenile fly  
161 sleep is a unique state that is different from mature fly homeostatic sleep rebound.

162

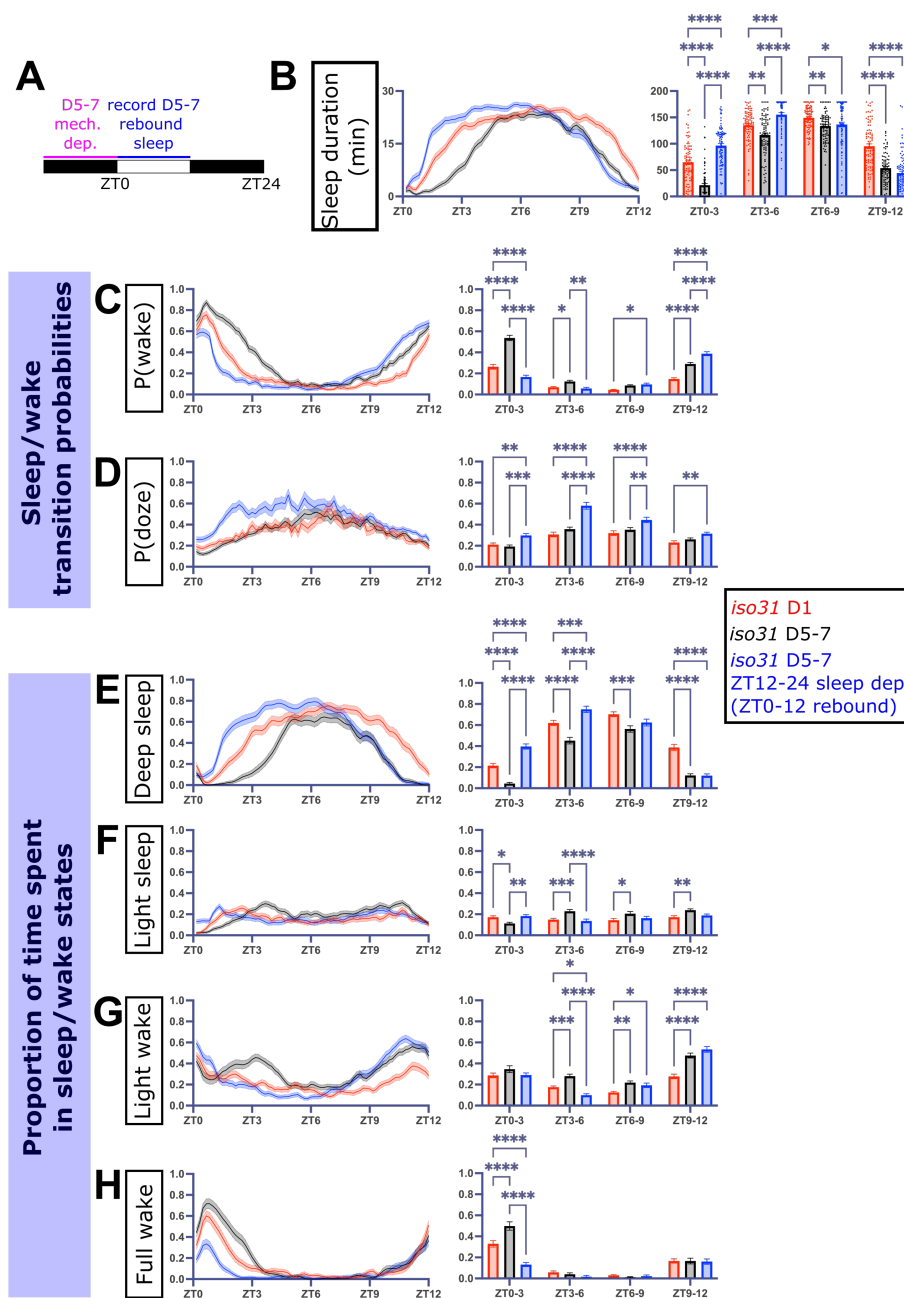

**Fig 2: The juvenile sleep state is distinct from homeostatic sleep rebound in mature flies.** A) Schematic of deprivation period and period of recorded rebound sleep in mature flies. B) Sleep duration, C) P(wake), D) P(doze), and proportion of time spent in E) deep sleep, F) light sleep, G) light wake, and H) full wake in rebounding mature *iso31* flies (blue,  $n = 90$ ) compared to non-deprived *iso31* mature flies (black,  $n = 85$ ) and juvenile *iso31* flies (red,  $n = 90$ ) (one-way ANOVA with post-hoc Tukey's multiple comparison test). For figures B-H, data shown is from ZT0-12 after overnight ZT12-24 deprivation. Left: sleep metric traces. Right: quantification of sleep metrics binned into 3-hour windows across ZT0-12.



163 *Sleep-promoting dorsal fan-shaped body neurons exhibit differential function between*  
164 *juvenile and mature flies*

165         During sleep rebound following deprivation, the dFB exhibits increased activity in  
166 mature flies (Donlea et al., 2014). Since the dFB is more active in juvenile flies (Kayser  
167 et al., 2014), we next asked whether activation of the dFB in mature flies results in a  
168 juvenile-like sleep state. We thermogenetically activated a sleep-promoting subset of  
169 dFB neurons using *R23E10-GAL4* (Donlea et al., 2018, 2014) to drive a heat-sensitive  
170 cation channel, *UAS-TrpA1* (Hamada et al., 2008) (*R23E10-GAL4>UAS-TrpA1*) in  
171 mature flies. Compared to a baseline 24 hours at 22°C, raising the temperature to 31°C  
172 significantly increased sleep during the day and the night compared to genetic controls  
173 in mature flies (**Fig 3A, E**). Activation of dFB neurons decreased P(wake) during both  
174 the day and the night, without changes to P(doze) during the day and increased P(doze)  
175 at night compared to one genetic control (**Fig 3B-C, F-G**). Finally, activation of dFB  
176 neurons also increased deep sleep in mature flies while decreasing the amount spent in  
177 the three other sleep/wake substates (**Fig 3H-K**). Thus, dFB neuron activation  
178 increases sleep in mature flies and mirrors some aspects of juvenile sleep; however,  
179 this manipulation also increases P(doze), distinct from the decrease in P(doze) normally  
180 observed in juvenile flies.

181

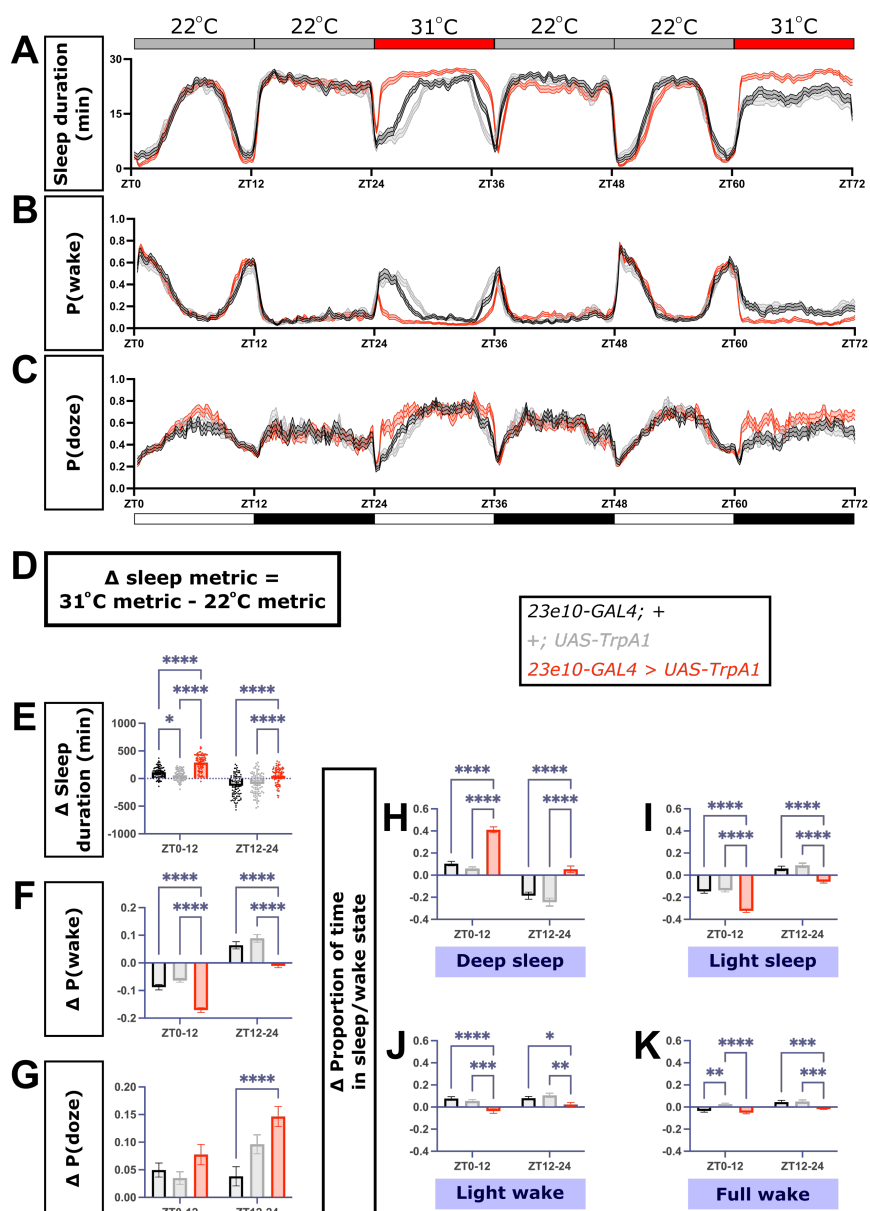

**Fig 3: Thermogenetic activation of *R23E10-GAL4*+ neurons in mature flies does not fully recapitulate the juvenile sleep state.** A) Sleep duration, B) P(wake), and C) P(doze) traces in *R23E10-GAL4 > UAS-TrpA1* (red, n = 102) flies and genetic controls (black, n = 97 and gray, n = 85). Gray bars at the top denote periods at 22°C, while red bars denote periods at 31°C. D) Formula used to calculate changes in sleep metrics. To account for differences in baseline sleep metrics between different genotypes at 22°C, changes in sleep metrics for individual flies was calculated. Change in E) sleep duration, F) P(wake), and G) P(doze) across ZT0-12 and ZT12-24. Changes in the proportion of time spent in H) deep sleep, I) light sleep, J) light wake, and K) full wake in the setting of thermogenetic *R23E10-GAL4* neuron activation (one-way ANOVA with post-hoc Tukey's multiple comparison test).

182           Increased dFB activity is thought to drive increased sleep in juvenile flies (Kayser  
183 et al., 2014), leading us to ask whether dFB inhibition in juvenile flies result in a mature-  
184 like sleep state. We drove expression of the inwardly-rectifying potassium channel,  
185 *Kir2.1*, in *R23E10-GAL4* neurons. To account for developmental effects of inhibiting the  
186 dFB, we utilized a ubiquitously-expressed temperature-sensitive *GAL80* repressor  
187 protein (*tub-GAL80<sup>ts</sup>*) (McGuire et al., 2004). Raising the temperature rapidly degrades  
188 *GAL80<sup>ts</sup>*, expressing the downstream *UAS* transgene. In juvenile flies, expressing a  
189 GFP-tagged *Kir2.1* in *R23E10-GAL4* neurons (*tub-GAL80<sup>ts</sup>; R23E10-GAL4>UAS-*  
190 *Kir2.1*) significantly decreased sleep duration during the night (**Fig 4A-C**). Sleep/wake  
191 transition probabilities were unaffected with dFB inhibition in juvenile flies (**Fig 4D-E**);  
192 however, nighttime deep sleep was decreased, while light sleep and light wake  
193 increased (**Fig 4F**). Thus, dFB inhibition in juvenile flies did not affect fully reflect  
194 mature-like sleep architecture. Together, these results suggest the dFB regulates  
195 different aspects of sleep architecture in mature and juvenile flies.

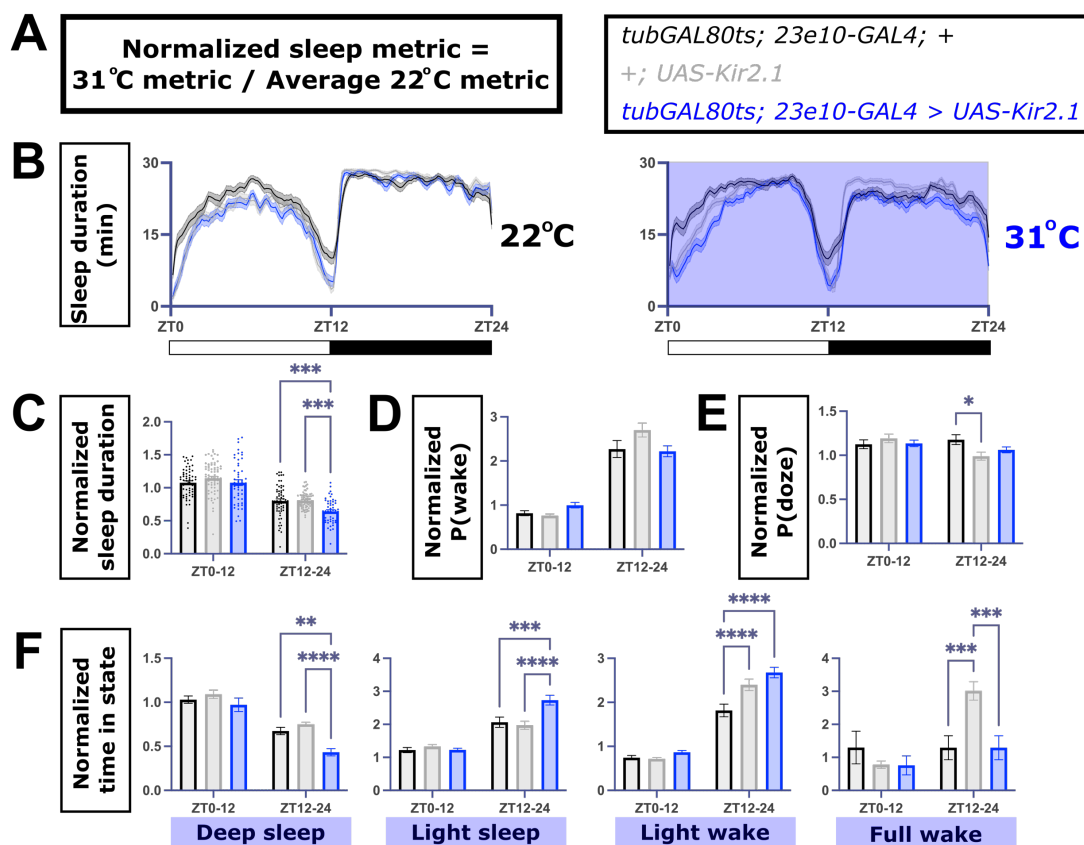

**Fig 4: Acutely expressing *Kir2.1* in *R23E10-GAL4+* neurons decreases sleep duration in juvenile flies but does not recapitulate mature fly sleep architecture.** A) Formula used to calculate normalized sleep metric. Sleep was recorded in juvenile flies one day post-eclosion, and sleep metrics were normalized to the average of the baseline at  $22^{\circ}\text{C}$ . Sleep duration traces of B) juvenile *tubGAL80ts; R23E10-GAL4>UAS-Kir2.1* (blue) vs genetic controls (black and gray) at  $22^{\circ}\text{C}$  (left) and  $31^{\circ}\text{C}$  (right). Normalized C) sleep duration, D) P(wake), E) P(doze), and F) time spent in each sleep state in juvenile flies ( $n = 75, 60, 54$  from left to right, one-way ANOVA with post-hoc Tukey's multiple comparison test).

197 *Distinct molecular profiles in juvenile vs mature dorsal fan-shaped body neurons reflects*  
198 *differential sleep-regulatory functions across the lifespan*

199       Maturation of dopaminergic projections to the dFB is a key event for sleep  
200 ontogeny (Chakravarti Dilley et al., 2020; Kayser et al., 2014), but whether sleep-  
201 promoting dFB neurons undergo intrinsic maturation is unknown. Single-cell RNA-Seq  
202 analysis of the adult fly brain at different ages previously identified a cluster of cells that  
203 contain those matching the expression profile of *R23E10-GAL4* sleep-promoting  
204 neurons (Davie et al., 2018). This cluster exhibited 55 differentially expressed genes  
205 (DEGs) between mature (day 9 post-eclosion) and juvenile (day 0-1 post-eclosion) flies  
206 (**Fig S3A**) (Davie et al., 2018). We used this dataset to ask how the transcriptomic  
207 profiles of dFB cells change during development. First, to identify mechanisms that  
208 might be responsible for dFB function in juvenile and mature flies, we performed gene  
209 set enrichment analysis (GSEA; Mootha et al., 2003; Subramanian et al., 2005). GSEA  
210 revealed the DEGs that were more highly expressed in mature flies were enriched for  
211 ribosomal and translational processes (**Table S2**). Conversely, while DEGs that were  
212 more highly expressed in juvenile flies were not significantly enriched for specific  
213 processes, we noted several of these genes were involved in transmembrane ion  
214 transport, synaptic transmission, and neurodevelopment (**Table S3**). Thus, dFB cells  
215 exhibit distinct gene expression profiles in juvenile and mature flies.

| Gene set name                         | # genes in gene set | Enrichment score | Normalized enrichment score | Nominal p-value | FDR q-val  |
|---------------------------------------|---------------------|------------------|-----------------------------|-----------------|------------|
| RIBONUCLEOPROTEIN COMPLEX             | 25                  | 0.8334325        | 3.3576221                   | 0               | 0          |
| STRUCTURAL CONSTITUENT OF RIBOSOME    | 23                  | 0.7740875        | 3.0646384                   | 0               | 0          |
| RIBOSOME                              | 23                  | 0.7740875        | 3.0391607                   | 0               | 0          |
| CYTOSOLIC PART                        | 23                  | 0.7740875        | 3.0359354                   | 0               | 0          |
| STRUCTURAL MOLECULE ACTIVITY          | 23                  | 0.7740875        | 3.0340197                   | 0               | 0          |
| RIBOSOMAL SUBUNIT                     | 23                  | 0.7740875        | 3.0132124                   | 0               | 0          |
| CYTOSOLIC RIBOSOME                    | 23                  | 0.7740875        | 3.0076745                   | 0               | 0          |
| MITOTIC CELL CYCLE PROCESS            | 15                  | 0.5640415        | 2.0024745                   | 0.00466201      | 0.00371607 |
| MICROTUBULE CYTOSKELETON ORGANIZATION | 15                  | 0.5558247        | 1.9938301                   | 0.00943396      | 0.00354415 |
| MICROTUBULE BASED PROCESS             | 15                  | 0.5558247        | 1.9627372                   | 0.00485437      | 0.00352023 |
| CYTOSKELETON ORGANIZATION             | 15                  | 0.5558247        | 1.9592851                   | 0               | 0.00320021 |
| MITOTIC CELL CYCLE                    | 16                  | 0.5014893        | 1.7472951                   | 0.01678657      | 0.01589365 |
| PROTEIN COMPLEX SUBUNIT ORGANIZATION  | 15                  | 0.46264157       | 1.6513298                   | 0.02849741      | 0.02640818 |

**Table S2:** GSEA results for DEGs with increased expression in mature compared to juvenile dFB cells.

216

| Gene       | Neurodevelopment | Synaptic transmission | Ion homeostasis |
|------------|------------------|-----------------------|-----------------|
| Cbp53E     | Blue             | Gray                  | Gray            |
| ringer     | Blue             | Gray                  | Gray            |
| CG45263    | Blue             | Gray                  | Gray            |
| miple1     | Blue             | Gray                  | Gray            |
| 14-3-3zeta | Blue             | Blue                  | Gray            |
| Syx1A      | Blue             | Blue                  | Gray            |
| Cam        | Blue             | Blue                  | Gray            |
| nSyb       | Gray             | Blue                  | Gray            |
| twz        | Gray             | Gray                  | Blue            |
| Vha14-1    | Gray             | Gray                  | Blue            |
| Vha36-1    | Gray             | Gray                  | Blue            |
| VhaM8.9    | Gray             | Gray                  | Blue            |
| Vha13      | Gray             | Gray                  | Blue            |
| Vha16-1    | Gray             | Gray                  | Blue            |
| Vha55      | Gray             | Gray                  | Blue            |
| porin      | Gray             | Gray                  | Blue            |
| ATPsynC    | Gray             | Gray                  | Blue            |
| jdp        | Gray             | Gray                  | Gray            |
| CG7582     | Gray             | Gray                  | Gray            |
| CG8974     | Gray             | Gray                  | Gray            |
| TM4SF      | Gray             | Gray                  | Gray            |
| CG32700    | Gray             | Gray                  | Gray            |
| CG31808    | Gray             | Gray                  | Gray            |
| CG3662     | Gray             | Gray                  | Gray            |
| RNASEK     | Gray             | Gray                  | Gray            |
| Rpl15      | Gray             | Gray                  | Gray            |
| Drat       | Gray             | Gray                  | Gray            |

**Table S3:** Associated GO terms for DEGs with increased expression in juvenile fly dFB cells. Blue boxes indicate a given gene is associated with the listed GO term, while gray indicates the gene is not associated with a GO term.

217           Next, we sought to determine whether developmental changes in the molecular  
218 landscape of *R23E10-GAL4*+ neurons relate to intrinsic maturation of these cells. We  
219 reasoned that DEGs with higher expression in the juvenile compared to mature dFB  
220 cells could be involved in the maturation of this sleep center, such that knockdown of  
221 these genes would affect sleep in the mature fly but not the juvenile fly. Specifically, we  
222 hypothesized sleep-promoting dFB neurons would be stunted in a more juvenile state.  
223 Using the *R23E10-GAL4* driver, we individually knocked down genes that were more  
224 highly expressed in the juvenile dFB neurons and recorded sleep in both juvenile and  
225 mature flies. When compared to genetic controls (*R23E10-GAL4>UAS-mCherry RNAi*),  
226 knockdown of DEGs with increased expression in juvenile flies did not differentially  
227 affect sleep duration from ZT0-12 (when juvenile and mature flies exhibited the largest  
228 differences in sleep duration) in juvenile versus mature flies (**Fig 5A; Fig S3B**).  
229 However, as our work demonstrates, focusing solely on sleep duration fails to capture  
230 more nuanced differences in sleep states between juvenile and mature flies. To  
231 examine sleep states, we first trained a HMM on data from mature *R23E10-GAL4>UAS-*  
232 *mCherry RNAi* control flies to account for genetic background. These flies exhibited the  
233 same differences in sleep/wake transition probabilities (**Fig S4A**) and HMM substates  
234 (**Fig S4B**) as *iso31* flies, indicating these changes remain consistent across genetic  
235 background. To determine whether knockdown of juvenile DEGs affects sleep states,  
236 we focused on P(wake) (**Fig 5B; Fig S3C**) and deep sleep (**Fig 5C; Fig S3D**) at ZT0-  
237 12, as these are the metrics with the largest differences between mature and juvenile  
238 flies. Compared to age-matched genetic controls, knockdown of genes with higher  
239 expression in juvenile dFB cells was associated with increased deep sleep in mature

240 flies versus juvenile flies (**Fig 5Ci**). This result is consistent with our hypothesis that  
241 knockdown of juvenile-specific dFB genes results in persistent immaturity of dFB  
242 function in the mature fly. Conversely, knockdown of genes with higher expression in  
243 mature dFB cells did not differentially affect sleep duration (**Fig 5Aii**), P(wake) (**Fig**  
244 **5Bii**), or deep sleep (**Fig 5Cii**) across age groups. These results provide functional  
245 evidence that distinct biological processes present in juvenile fly dFB cells are important  
246 for *R23E10-GAL4* neuron maturation.

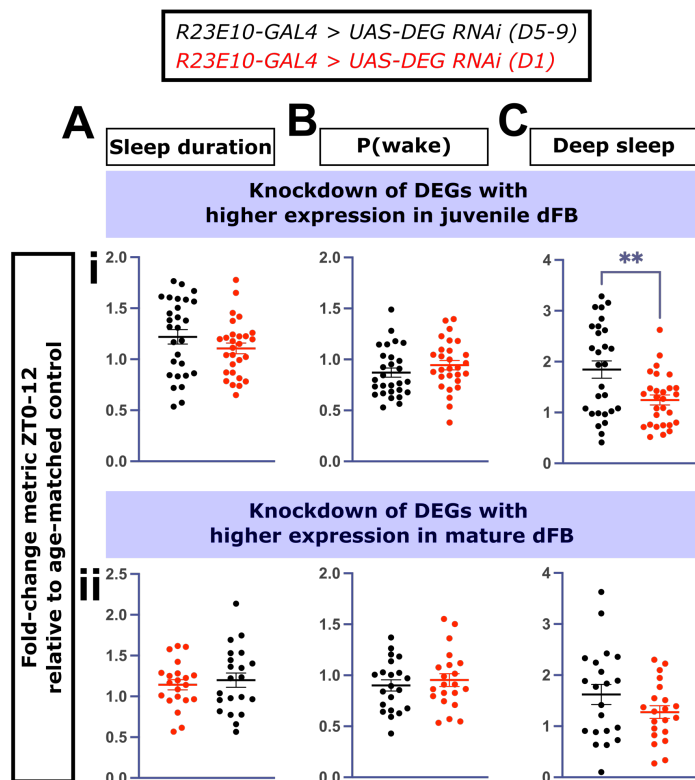

**Fig 5: Knockdown of DEGs with higher expression in juvenile dFB cells increases deep sleep in mature flies more than in juvenile flies.** Fold-change in A) sleep duration, B) P(wake) and C) deep sleep from ZT0-12 in mature (black) and juvenile (red) flies compared to age-matched genetic controls (*R23E10-GAL4>UAS-mCherry RNAi*) in the setting of *R23E10-GAL4*-mediated knockdown of overexpressed genes in i) juvenile dFB cells and ii) mature dFB cells. Each data point represents a different RNAi line for a specific DEG;  $n \geq 10$  flies per line (two-tailed T-tests).

247



248

249

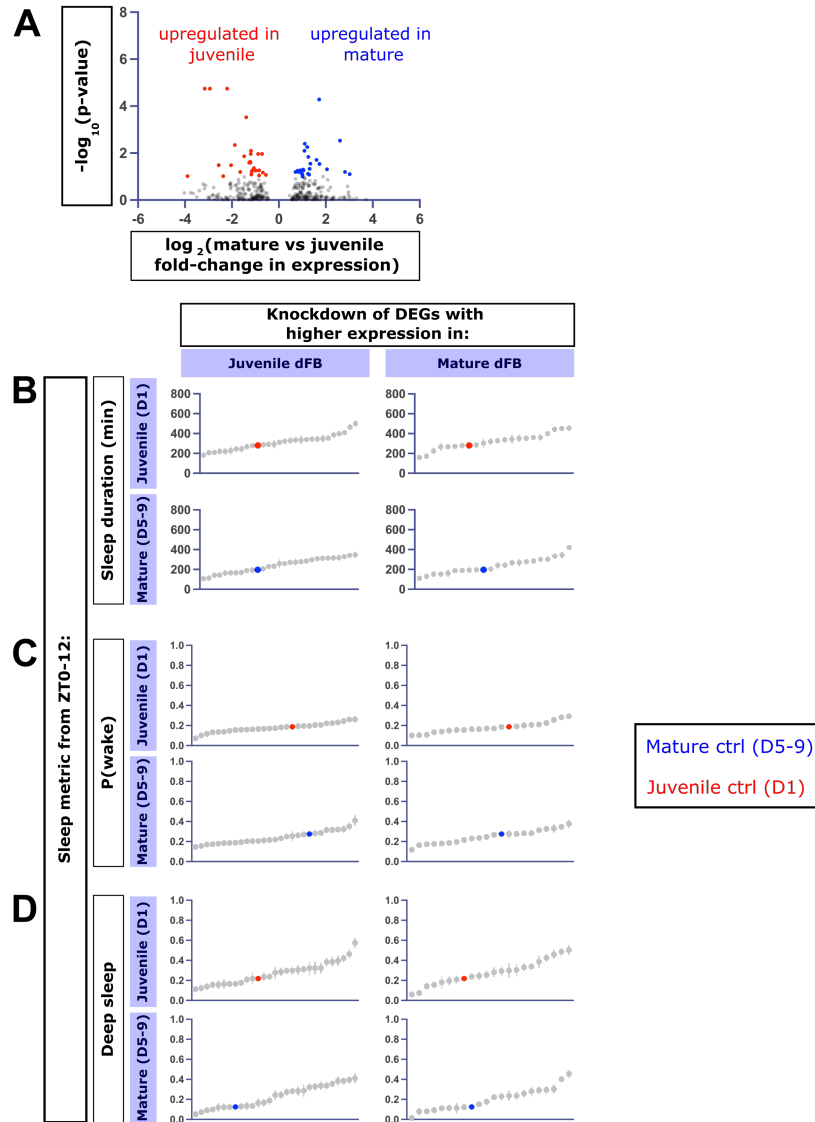

**Fig S3: Sleep duration, P(wake), and proportion of time spent in deep sleep from an RNAi-based screen of differentially-expressed genes in dFB neurons in juvenile vs mature flies.** A) Differentially expressed genes (DEGs) based on published datasets (Davie et al., 2018). Red: genes that are more highly expressed in juvenile vs mature flies, blue: genes that are more highly expressed in mature vs juvenile flies, based on an adjusted p-value cut-off ( $p\text{-adj} > 0.1$ ). B) Sleep duration, C) P(wake), and D) proportion of time in deep sleep across ZT0-12 in juvenile vs mature flies in *R23E10-GAL4>UAS-RNAi* ( $n \geq 10$  per RNAi line; gray) compared to age-matched genetic controls (juvenile: red; mature: blue). Knockdown of DEGs with higher expression in juvenile dFB neurons (left graphs in B,C) result in comparable sleep duration and P(wake) distributions in juvenile vs mature flies around the age-matched control. Knockdown of genes with higher expression in juvenile dFB neurons skews mature fly deep sleep to the right (D, bottom left) compared to knockdown of the same genes in juvenile flies (D, top left). Knockdown of DEGs with higher expression in mature dFB neurons (right graphs in B-D) does not differentially skew sleep metric distributions when comparing juvenile vs mature flies.

250

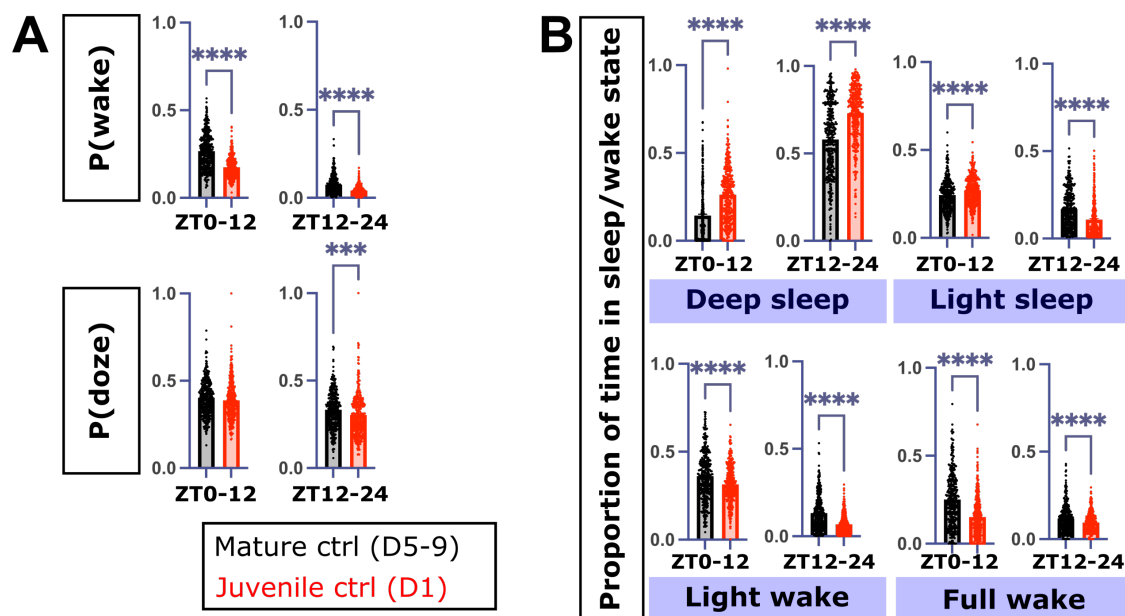

**Fig S4: *R23E10-GAL4>UAS-mCherry RNAi* control flies exhibit the same sleep architecture differences across development as *iso31* flies. A) P(wake) (top), P(doze) (bottom), and B) proportion of time spent in sleep/wake states from ZT0-12 and ZT12-24 in mature (black, n = 344) vs juvenile (red, n = 347) *R23E10-GAL4>UAS-mCherry RNAi* controls (two-tailed T-tests).**

251

## 252 **Discussion**

253           Sleep duration in early life is consistently greater than later in life across species,  
254 but how maturation of individual neural circuits contributes to ontogenetic changes in  
255 sleep architecture is unclear. In this study, we describe changes in sleep/wake transition  
256 probabilities and substates in *Drosophila* that accompany changes in sleep duration  
257 across the lifespan. Using these probabilistic methods, we identify mechanisms  
258 underlying intrinsic dFB maturation contributing to sleep maturation. Our results link  
259 changes in the molecular profile of sleep output neurons to sleep ontogeny.

260           Here, we demonstrated quantifiable differences in sleep architecture across the  
261 lifespan. How does the unique sleep quality in juvenile flies contribute to  
262 neurodevelopment? In mammals, REM and non-REM sleep differentially contribute to  
263 development (Knoop et al., 2021). The proportion of REM sleep is significantly  
264 increased in neonates (Roffwarg et al., 1966), and plays a critical role in  
265 neurodevelopment. For example, REM sleep is necessary for plasticity in the  
266 developing visual cortex (Bridi et al., 2015; Frank et al., 2001; Shaffery et al., 2002) and  
267 selective strengthening of synaptic contacts occurs during REM sleep in early life (Li et  
268 al., 2017). A preponderance of motor twitches also occurs during REM sleep in young  
269 animals, and increased REM is thought to be important for patterning of sensorimotor  
270 circuits from these inputs (Blumberg et al., 2013; Mohns and Blumberg, 2010; Sokoloff  
271 et al., 2021). Despite evidence that REM sleep is important for neurodevelopment, we  
272 understand little about the genetic mechanisms linking the two. Furthermore, non-REM  
273 sleep is proportionally decreased compared to REM sleep, but still plays a role in  
274 synaptic pruning (Tononi and Cirelli, 2006) and cortical maturation (Kurth et al., 2010),

275 especially during later developmental periods beyond the neonatal stage. However, like  
276 with REM sleep, the mechanisms connecting NREM sleep to neurodevelopment remain  
277 unknown. Our study establishes a genetically-tractable model to identify molecular  
278 regulators of sleep states that are important for sleep-dependent neurodevelopment.

279         While development of arousal-promoting dopaminergic neurons is known to be  
280 essential for normal sleep ontogeny (Chakravarti Dilley et al., 2020), we now find that  
281 intrinsic maturation in sleep output neurons also contributes to differences in sleep  
282 between mature and juvenile animals. The dFB exhibits increased activity in juvenile  
283 compared to mature flies, which results in excess sleep duration in early life (Kayser et  
284 al., 2014). We found while dFB inhibition decreases daily sleep in juvenile flies, this  
285 manipulation does not result in “mature-like” sleep architecture. Conversely, even  
286 though dFB activation in mature flies increases sleep duration, this sleep does not fully  
287 recapitulate the juvenile sleep state from a sleep architecture perspective. In mature  
288 flies, the dFB is involved in rebound following sleep deprivation, and disrupting the  
289 function of the dFB by knocking down various signaling components blunts rebound  
290 (Donlea et al., 2018, 2014; Qian et al., 2017). These results suggest that the dFB  
291 regulates sleep during periods of increased homeostatic drive, such as during early life  
292 and in the sleep-deprived mature adult. However, several lines of evidence suggest  
293 sleep in juvenile flies is nonetheless distinct compared to rebound sleep in mature flies  
294 (Dilley et al., 2018). Of note, a recent study showed that sleep resulting from dFB  
295 activation in mature flies is electrophysiologically-distinct from endogenous rebound  
296 sleep in mature flies (Tainton-Heap et al., 2021). We additionally show rebound sleep in  
297 mature flies is distinct from juvenile fly sleep, indicating juvenile fly sleep is not simply

298 the same state of heightened homeostatic drive. Several circuits may also act together  
299 to differentially influence sleep architecture in juvenile versus mature flies, which may  
300 explain the differences we see with dFB manipulation. Nevertheless, single-cell RNA  
301 Seq analysis revealed distinct molecular profiles in the dFB in juvenile flies compared to  
302 mature flies, supporting the hypothesis that these neurons undergo intrinsic  
303 development that may govern differential sleep-regulatory function in juvenile and  
304 mature flies. Our functional studies suggest the sleep-promoting dFB neurons have a  
305 changing role in sleep across development: while they influence baseline sleep in  
306 juvenile flies, they play a more specific role in rebound sleep in mature flies.

307 We show that distinct molecular mechanisms present in juvenile fly dFB cells  
308 govern dFB function maturation, but how these processes are involved in the  
309 development of the dFB in the context of sleep ontogeny is unclear. Knockdown of  
310 ribosomal function and translation-related DEGs that were overexpressed in the mature  
311 fly dFB neurons did not differentially affect sleep in juvenile versus mature flies.  
312 Conversely, knockdown of DEGs involved in synaptic function, ion homeostasis, and  
313 neurodevelopment that were overexpressed in juvenile fly dFB increased deep sleep in  
314 the mature fly more so than in juvenile flies. Notably, knockdown of these DEGs did not  
315 differentially affect sleep duration in mature and juvenile flies, even though we observed  
316 significant effects on sleep architecture. These results highlight the utility of non-  
317 invasive computational approaches in the fly for investigating sleep architecture. One  
318 possible interpretation of these findings is that genes with higher expression in dFB in  
319 early adult life are important for the maturation of *R23E10-GAL4+* neurons, while genes  
320 that are more highly expressed later in life are important for the sleep-regulatory

321 function of these neurons in mature flies. For example, genes with higher expression in  
322 the mature dFB neurons may be involved in mediating appropriate sleep rebound  
323 following deprivation. Another possibility lies in the heterogeneity of dFB sleep neurons:  
324 individual dFB neurons exhibit vastly different excitabilities (Donlea et al., 2014;  
325 Pimentel et al., 2016), suggesting the dFB contains a diverse group of sleep neurons.  
326 Knockdown of genes that are overexpressed in juvenile flies may inhibit the  
327 development of dFB neurons that are specifically relevant in mature flies. Intersectional  
328 approaches to investigate the contribution of specific sub groups of dFB neurons to  
329 sleep in juvenile and mature flies would be informative for our understanding of the dFB  
330 circuits underlying sleep ontogeny. Together, these results provide a framework for  
331 understanding the molecular processes governing maturation of sleep output neurons to  
332 influence sleep ontogeny.

333

334

## 335 **Materials and Methods**

### 336 Fly stocks

337 Flies were raised and maintained on standard molasses food (8.0% molasses, 0.55%  
338 agar, 0.2% Tegosept, 0.5% propionic acid) at 25°C on a 12hr:12hr light:dark cycle.  
339 Female flies were used in all experiments.

340

### 341 Fly strains

342 *Iso31* was a laboratory strain. *UAS-dTrpA1* was a gift from Dr. Leslie Griffith (Brandeis  
343 University). *R23E10-GAL4*, *UAS-Kir2.1-GFP*, and *UAS-mCherry RNAi* were obtained

344 from the Bloomington Drosophila Resource Center. All RNAi strains were obtained from  
345 Bloomington Drosophila Resource Center.

346

#### 347 Sleep assays

348 For ontogeny experiments unless otherwise specified, newly-eclosed female flies were  
349 collected and aged in group housing on standard food. Juvenile flies were collected on  
350 the day of eclosion and loaded into the DAM system between ZT4-6, along with mature  
351 flies aged 5-9 days post-eclosion. Unless otherwise specified, sleep assays were run at  
352 25 °C on a 12-hour/12-hour light/dark schedule.

353

#### 354 Thermogenetic activation and inhibition experiments

355 Animals were raised at 18 °C to prevent TrpA1 activation or Kir2.1 expression during  
356 development. For TrpA1 activation experiments, adult female flies were collected 2-3  
357 days post-eclosion and aged at 18 °C on standard fly food. 5-9 day old flies were loaded  
358 into the DAM system to monitor sleep and placed at 22 °C on a 12:12: LD schedule for 3  
359 days. TrpA1 activation was performed by a temperature shift to 31 °C across non-  
360 consecutive 12-hour light or 12-hour dark periods. Between increases in temperature,  
361 flies were maintained at 22 °C. For Kir2.1 inhibition experiments, adult female flies were  
362 collected at eclosion and aged at 18 °C in group-housed conditions. Juvenile flies were  
363 collected at eclosion from ZT4-6 and loaded into the DAM system along with 5-9 day old  
364 flies at 31 °C. For Kir2.1-GFP immunohistochemistry experiments, flies were collected  
365 as described above and shifted to 31 °C 20 hours before dissection.

366

367 Sleep/wake transition probabilities and hidden Markov modeling analysis

368 P(wake) and P(doze) were calculated from 1-minute bins of activity collected in the  
369 DAM system in Matlab as previously described (Wiggin et al., 2020). Hidden Markov  
370 modeling of sleep/wake substates was constrained with parameters as previously  
371 described (Wiggin et al., 2020): a transition from deep sleep to full wake could only do  
372 so through light wake, while a transition from full wake to deep sleep could only do so  
373 through light sleep. HMMs were trained on the transitions (wake or doze) between 1-  
374 minute bins of activity (for 24 hours, 1439 transitions per fly). HMM fitting and hidden  
375 state analysis was performed as previously described using the Matlab Statistics and  
376 Machine Learning Toolkit (Wiggin et al., 2020). For characterizing ontogenetic  
377 differences in juvenile vs mature *iso31* fly sleep/wake substates (**Fig 1** and associated  
378 supplemental figures), HMMs were trained based on transitions as measured using the  
379 DAM5H multibeam system (Trikinetics). For *iso31* sleep deprivation experiments (**Fig 2**)  
380 and *R23E10-GAL4+* neuron functional manipulations (**Fig 3-4**), an HMM was trained on  
381 mature *iso31* activity transitions measured using the single beam DAM system  
382 (Trikinetics) (see **Table S4** for transition and emission probabilities). A separate HMM  
383 was trained on activity transitions measured using the single beam DAM system from all  
384 *R23E10-GAL4>UAS-mCherry RNAi* flies (see **Table S5** for transition and emission  
385 probabilities). Trained HMMs were used to calculate the proportion of time spent in  
386 sleep/wake hidden states.

387

388

389



| HMM fit to D5-7 <i>iso31</i> fly locomotor activity from single-beam DAM system: |             |                |             |            |           |                       |             |      |      |
|----------------------------------------------------------------------------------|-------------|----------------|-------------|------------|-----------|-----------------------|-------------|------|------|
|                                                                                  |             | Transition to: |             |            |           | Emission probability: |             |      |      |
| State                                                                            |             | Deep sleep     | Light sleep | Light wake | Full wake | Inactivity            | Activity    |      |      |
| Transition from:                                                                 | Deep sleep  | 0.96           | 0.00        | 0.04       | 0.00      | State:                | Deep sleep  | 1.00 | 0.00 |
|                                                                                  | Light sleep | 0.07           | 0.72        | 0.21       | 0.00      |                       | Light sleep | 1.00 | 0.00 |
|                                                                                  | Light wake  | 0.00           | 0.43        | 0.24       | 0.32      |                       | Light wake  | 0.01 | 0.99 |
|                                                                                  | Full wake   | 0.00           | 0.07        | 0.00       | 0.93      |                       | Full wake   | 0.04 | 0.96 |

**Table S4:** HMM parameters used to calculate proportion of time spent in sleep/wake substates for Figures 2-4. Transition probabilities between hidden states and emission probabilities from each hidden state to observed states for HMM trained on mature *iso31* fly (n = 90 flies) locomotor data collected using the single beam DAM system.

| HMM fit to D5-9 <i>R23E10-GAL4&gt;UAS-mCherry RNAi</i> fly locomotor activity: |             |                |             |            |           |                       |             |      |      |
|--------------------------------------------------------------------------------|-------------|----------------|-------------|------------|-----------|-----------------------|-------------|------|------|
|                                                                                |             | Transition to: |             |            |           | Emission probability: |             |      |      |
| State                                                                          |             | Deep sleep     | Light sleep | Light wake | Full wake | Inactivity            | Activity    |      |      |
| Transition from:                                                               | Deep sleep  | 0.99           | 0.00        | 0.01       | 0.00      | State:                | Deep sleep  | 1.00 | 0.00 |
|                                                                                | Light sleep | 0.02           | 0.83        | 0.15       | 0.00      |                       | Light sleep | 1.00 | 0.00 |
|                                                                                | Light wake  | 0.00           | 0.12        | 0.87       | 0.02      |                       | Light wake  | 0.45 | 0.55 |
|                                                                                | Full wake   | 0.00           | 0.02        | 0.00       | 0.98      |                       | Full wake   | 0.23 | 0.77 |

**Table S5:** HMM parameters used to calculate proportion of time spent in sleep/wake substates for Figure 5 and associated supplemental figures. Transition probabilities between hidden states and emission probabilities from each hidden state to observed states for HMM trained on mature *R23E10-GAL4>UAS-mCherry RNAi* fly (n = 344 flies) locomotor data collected using the single beam DAM system.

390  
 391 Single cell RNA-Seq analysis  
 392 Using published single-cell data from *Drosophila* brains, cells annotated as dFB  
 393 neurons were extracted from previously performed clustering(Davie et al., 2018) (cluster  
 394 61 in the 57K dataset with clustering resolution 2.0) and collapsed into pseudobulk  
 395 transcriptomes per replicate. Differential expression comparing young (d0 or d1 flies) vs  
 396 old (d9 flies) was performed on both sets of pseudobulk transcriptomes using DESeq2  
 397 (Love et al., 2014). Genes significantly differentially expressed (p-adj < 0.1) formed the  
 398 candidate list for the RNAi-based screen.

399

#### 400 Gene set enrichment analysis of differentially expressed dFB genes

401 Gene set collections for Gene Ontology annotations were downloaded from public  
402 sources (Powell, 2014). To compare DEGs upregulated in mature or juvenile flies, a  
403 gene signature was generated by ranking all DEGs with  $p\text{-adj} > 0.1$  according to  
404 DEseq2-derived test statistics. Enrichment analysis was performed with GSEA v4.0  
405 (Subramanian et al., 2005) using weighted statistical analysis. Gene sets with a false  
406 discovery rate  $< 0.25$  were considered significantly enriched.

407

#### 408 RNAi-based ontogeny screen of differentially expressed dFB genes

409 Virgin collected from the *R23E10-GAL4* fly stock were crossed to males of RNAi fly  
410 stocks from the Transgenic RNAi Project (TRiP) collection (Ni et al., 2011). We utilized  
411 all available VALIUM10, VALIUM20, or VALIUM22 lines for a given gene. For controls,  
412 we used *R23E10-GAL4 x UAS-mCherry RNAi*. Sleep ontogeny assays were performed  
413 as described above. The DAM system was used to collect 1-minute bins of activity for  
414 calculating sleep/wake transition probabilities and HMM hidden states.

415

#### 416 Statistical analysis

417 All statistical analyses were performed using GraphPad Prism (version 8.4.1). Sample  
418 size, specific tests, and significance values are denoted in figure legends.

419

420 **Acknowledgements:**

421 We thank members of the Kayser Lab, Raizen Lab, Leela Chakravarti Dilley, and  
422 members of the Penn Chronobiology and Sleep Institute for helpful discussions/input.

423 We thank Leslie Griffith and Timothy Wiggin for assisting with the custom Matlab codes  
424 used for sleep/wake transition probabilities and hidden Markov modeling of sleep/wake  
425 substates.

426

427 **Funding:** This work was supported by NIH grants DP2NS111996, R56NS109144, and  
428 R01NS120979 to M.S.K., T32HL07953 to N.N.G., and R21MH123841 and  
429 R01AG071818 to R.B. Additional funding was from the Burroughs Wellcome Career  
430 Award for Medical Scientists to M.S.K., the 2020 Max Planck Humboldt Research  
431 Award to R.B., and NSF grant CPS2038873 and the Honda Research Institute to K.S.

432

433 **Competing Interests:** none

434

## 435 **References**

- 436 Artiushin G, Sehgal A. 2017. The *Drosophila* circuitry of sleep-wake regulation. *Curr*  
437 *Opin Neurobiol* **44**:243–250. doi:10.1016/j.conb.2017.03.004
- 438 Blake H, Gerard RW. 1937. Brain potentials during sleep. *American Journal of*  
439 *Physiology-Legacy Content* **119**:692–703. doi:10.1152/ajplegacy.1937.119.4.692
- 440 Blumberg MS. 2015. Developing Sensorimotor Systems in Our Sleep. *Curr Dir Psychol*  
441 *Sci* **24**:32–37. doi:10.1177/0963721414551362
- 442 Blumberg MS, Marques HG, Iida F. 2013. Twitching in sensorimotor development from  
443 sleeping rats to robots. *Curr Biol* **23**:R532–537. doi:10.1016/j.cub.2013.04.075
- 444 Bridi MCD, Aton SJ, Seibt J, Renouard L, Coleman T, Frank MG. 2015. Rapid eye  
445 movement sleep promotes cortical plasticity in the developing brain. *Science*  
446 *Advances* **1**:e1500105. doi:10.1126/sciadv.1500105
- 447 Cao J, Herman AB, West GB, Poe G, Savage VM. 2020. Unraveling why we sleep:  
448 Quantitative analysis reveals abrupt transition from neural reorganization to  
449 repair in early development. *Science Advances* **6**:eaba0398.  
450 doi:10.1126/sciadv.aba0398
- 451 Chakravarti Dilley L, Szuperak M, Gong NN, Williams CE, Saldana RL, Garbe DS, Syed  
452 MH, Jain R, Kayser MS. 2020. Identification of a molecular basis for the juvenile  
453 sleep state. *eLife* **9**:e52676. doi:10.7554/eLife.52676
- 454 Clancy JJ, Caldwell DF, Villeneuve MJ, Sangiah S. 1978. Daytime sleep-wake cycle in  
455 the rat. *Physiology & Behavior* **21**:457–459. doi:10.1016/0031-9384(78)90109-9
- 456 Davie K, Janssens J, Koldere D, De Waegeneer M, Pech U, Kreft Ł, Aibar S, Makhzami  
457 S, Christiaens V, Bravo González-Blas C, Poovathingal S, Hulselmans G,  
458 Spanier KI, Moerman T, Vanspauwen B, Geurs S, Voet T, Lammertyn J,  
459 Thienpont B, Liu S, Konstantinides N, Fiers M, Verstreken P, Aerts S. 2018. A  
460 Single-Cell Transcriptome Atlas of the Aging *Drosophila* Brain. *Cell* **174**:982-  
461 998.e20. doi:10.1016/j.cell.2018.05.057
- 462 Dilley LC, Vigderman A, Williams CE, Kayser MS. 2018. Behavioral and genetic  
463 features of sleep ontogeny in *Drosophila*. *Sleep* **41**. doi:10.1093/sleep/zsy086
- 464 Donlea JM, Pimentel D, Miesenbock G. 2014. Neuronal Machinery of Sleep  
465 Homeostasis in *Drosophila*. *Neuron* **81**:1442. doi:10.1016/j.neuron.2014.03.008
- 466 Donlea JM, Pimentel D, Talbot CB, Kempf A, Omoto JJ, Hartenstein V, Miesenbock G.  
467 2018. Recurrent Circuitry for Balancing Sleep Need and Sleep. *Neuron*  
468 **97**:389.e4. doi:S0896-6273(17)31139-X [pii]
- 469 Eban-Rothschild A, Appelbaum L, de Lecea L. 2018. Neuronal Mechanisms for  
470 Sleep/Wake Regulation and Modulatory Drive. *Neuropsychopharmacol* **43**:937–  
471 952. doi:10.1038/npp.2017.294
- 472 Frank MG, Issa NP, Stryker MP. 2001. Sleep enhances plasticity in the developing  
473 visual cortex. *Neuron* **30**:275–287.

- 474 Hamada FN, Rosenzweig M, Kang K, Pulver SR, Ghezzi A, Jegla TJ, Garrity PA. 2008.  
475 An internal thermal sensor controlling temperature preference in *Drosophila*.  
476 *Nature* **454**:217–220. doi:10.1038/nature07001
- 477 Jones CE, Opel RA, Kaiser ME, Chau AQ, Quintana JR, Nipper MA, Finn DA,  
478 Hammock EAD, Lim MM. 2019. Early-life sleep disruption increases parvalbumin  
479 in primary somatosensory cortex and impairs social bonding in prairie voles.  
480 *Science Advances* **5**:eaav5188. doi:10.1126/sciadv.aav5188
- 481 Jouvet-Mounier D, Astic L, Lacote D. 1969. Ontogenesis of the states of sleep in rat,  
482 cat, and guinea pig during the first postnatal month. *Developmental*  
483 *Psychobiology* **2**:216–239. doi:10.1002/dev.420020407
- 484 Kayser MS, Biron D. 2016. Sleep and Development in Genetically Tractable Model  
485 Organisms. *Genetics* **203**:21–33. doi:10.1534/genetics.116.189589
- 486 Kayser MS, Yue Z, Sehgal A. 2014. A critical period of sleep for development of  
487 courtship circuitry and behavior in *Drosophila*. *Science (New York, NY)* **344**:269–  
488 274. doi:10.1126/science.1250553 [doi]
- 489 Knoop MS, Groot ER de, Dudink J. 2021. Current ideas about the roles of rapid eye  
490 movement and non-rapid eye movement sleep in brain development. *Acta*  
491 *Paediatrica* **110**:36–44. doi:10.1111/apa.15485
- 492 Kurth S, Ringli M, Geiger A, LeBourgeois M, Jenni OG, Huber R. 2010. Mapping of  
493 cortical activity in the first two decades of life: a high-density sleep  
494 electroencephalogram study. *J Neurosci* **30**:13211–13219.  
495 doi:10.1523/JNEUROSCI.2532-10.2010
- 496 Lendner JD, Helfrich RF, Mander BA, Romundstad L, Lin JJ, Walker MP, Larsson PG,  
497 Knight RT. 2020. An electrophysiological marker of arousal level in humans.  
498 *eLife* **9**:e55092. doi:10.7554/eLife.55092
- 499 Li W, Ma L, Yang G, Gan W-B. 2017. REM sleep selectively prunes and maintains new  
500 synapses in development and learning. *Nat Neurosci* **20**:427–437.  
501 doi:10.1038/nn.4479
- 502 Liu Q, Liu S, Kodama L, Driscoll MR, Wu MN. 2012. Two dopaminergic neurons signal  
503 to the dorsal fan-shaped body to promote wakefulness in *Drosophila*. *Current*  
504 *biology: CB* **22**:2114–2123. doi:10.1016/j.cub.2012.09.008
- 505 Marks GA, Shaffery JP, Oksenberg A, Speciale SG, Roffwarg HP. 1995. A functional  
506 role for REM sleep in brain maturation. *Behav Brain Res* **69**:1–11.  
507 doi:10.1016/0166-4328(95)00018-o
- 508 McGuire SE, Mao Z, Davis RL. 2004. Spatiotemporal Gene Expression Targeting with  
509 the TARGET and Gene-Switch Systems in *Drosophila*. *Sci STKE* **2004**:pl6–pl6.  
510 doi:10.1126/stke.2202004pl6
- 511 Mohs EJ, Blumberg MS. 2010. Neocortical activation of the hippocampus during sleep  
512 in infant rats. *J Neurosci* **30**:3438–3449. doi:10.1523/JNEUROSCI.4832-09.2010
- 513 Mootha VK, Lindgren CM, Eriksson K-F, Subramanian A, Sihag S, Lehar J, Puigserver  
514 P, Carlsson E, Ridderstråle M, Laurila E, Houstis N, Daly MJ, Patterson N,

- 515 Mesirov JP, Golub TR, Tamayo P, Spiegelman B, Lander ES, Hirschhorn JN,  
516 Altshuler D, Groop LC. 2003. PGC-1 $\alpha$ -responsive genes involved in oxidative  
517 phosphorylation are coordinately downregulated in human diabetes. *Nat Genet*  
518 **34**:267–273. doi:10.1038/ng1180
- 519 Ni J-Q, Zhou R, Czech B, Liu L-P, Holderbaum L, Yang-Zhou D, Shim H-S, Tao R,  
520 Handler D, Karpowicz P, Binari R, Booker M, Brennecke J, Perkins LA, Hannon  
521 GJ, Perrimon N. 2011. A genome-scale shRNA resource for transgenic RNAi in  
522 *Drosophila*. *Nat Methods* **8**:405–407. doi:10.1038/nmeth.1592
- 523 Nitz DA, van Swinderen B, Tononi G, Greenspan RJ. 2002. Electrophysiological  
524 correlates of rest and activity in *Drosophila melanogaster*. *Curr Biol* **12**:1934–  
525 1940. doi:10.1016/s0960-9822(02)01300-3
- 526 Pimentel D, Donlea JM, Talbot CB, Song SM, Thurston AJF, Miesenböck G. 2016.  
527 Operation of a homeostatic sleep switch. *Nature* **536**:333–337.  
528 doi:10.1038/nature19055
- 529 Powell JAC. 2014. GO2MSIG, an automated GO based multi-species gene set  
530 generator for gene set enrichment analysis. *BMC Bioinformatics* **15**:146.  
531 doi:10.1186/1471-2105-15-146
- 532 Qian Y, Cao Y, Deng B, Yang G, Li J, Xu R, zhang D, Huang J, Rao Y. 2017. Sleep  
533 homeostasis regulated by 5HT2b receptor in a small subset of neurons in the  
534 dorsal fan-shaped body of *drosophila*. *eLife* **6**:e26519. doi:10.7554/eLife.26519
- 535 Roffwarg HP, Muzio JN, Dement WC. 1966. Ontogenetic Development of the Human  
536 Sleep-Dream Cycle. *Science* **152**:604–619. doi:10.1126/science.152.3722.604
- 537 Scammell TE, Arrigoni E, Lipton JO. 2017. Neural Circuitry of Wakefulness and Sleep.  
538 *Neuron* **93**:747–765. doi:10.1016/j.neuron.2017.01.014
- 539 Seugnet L, Suzuki Y, Donlea JM, Gottschalk L, Shaw PJ. 2011. Sleep deprivation  
540 during early-adult development results in long-lasting learning deficits in adult  
541 *Drosophila*. *Sleep* **34**:137–146. doi:10.1093/sleep/34.2.137
- 542 Shaffery JP, Sinton CM, Bissette G, Roffwarg HP, Marks GA. 2002. Rapid eye  
543 movement sleep deprivation modifies expression of long-term potentiation in  
544 visual cortex of immature rats. *Neuroscience* **110**:431–443. doi:10.1016/S0306-  
545 4522(01)00589-9
- 546 Shaw PJ, Cirelli C, Greenspan RJ, Tononi G. 2000. Correlates of Sleep and Waking in  
547 *Drosophila melanogaster*. *Science* **287**:1834–1837.  
548 doi:10.1126/science.287.5459.1834
- 549 Sokoloff G, Dooley JC, Glanz RM, Wen RY, Hickerson MM, Evans LG, Laughlin HM,  
550 Apfelbaum KS, Blumberg MS. 2021. Twitches emerge postnatally during quiet  
551 sleep in human infants and are synchronized with sleep spindles. *Current*  
552 *Biology*. doi:10.1016/j.cub.2021.05.038
- 553 Subramanian A, Tamayo P, Mootha VK, Mukherjee S, Ebert BL, Gillette MA, Paulovich  
554 A, Pomeroy SL, Golub TR, Lander ES, Mesirov JP. 2005. Gene set enrichment

- 555 analysis: A knowledge-based approach for interpreting genome-wide expression  
556 profiles. *PNAS* **102**:15545–15550. doi:10.1073/pnas.0506580102
- 557 Tainton-Heap LAL, Kirszenblat LC, Notaras ET, Grabowska MJ, Jeans R, Feng K,  
558 Shaw PJ, van Swinderen B. 2021. A Paradoxical Kind of Sleep in *Drosophila*  
559 *melanogaster*. *Current Biology* **31**:578-590.e6. doi:10.1016/j.cub.2020.10.081
- 560 Tononi G, Cirelli C. 2006. Sleep function and synaptic homeostasis. *Sleep Med Rev*  
561 **10**:49–62. doi:10.1016/j.smrv.2005.05.002
- 562 Ueno T, Tomita J, Tanimoto H, Endo K, Ito K, Kume S, Kume K. 2012. Identification of a  
563 dopamine pathway that regulates sleep and arousal in *Drosophila*. *Nature*  
564 *Neuroscience* **15**:1516–1523. doi:10.1038/nn.3238
- 565 Weber F. 2017. Modeling the mammalian sleep cycle. *Current Opinion in Neurobiology,*  
566 *Computational Neuroscience* **46**:68–75. doi:10.1016/j.conb.2017.07.009
- 567 Wiggin TD, Goodwin PR, Donelson NC, Liu C, Trinh K, Sanyal S, Griffith LC. 2020.  
568 Covert sleep-related biological processes are revealed by probabilistic analysis in  
569 *Drosophila*. *PNAS* **117**:10024–10034. doi:10.1073/pnas.1917573117
- 570 Yamabe M, Horie K, Shiokawa H, Funato H, Yanagisawa M, Kitagawa H. 2019. MC-  
571 SleepNet: Large-scale Sleep Stage Scoring in Mice by Deep Neural Networks.  
572 *Sci Rep* **9**:15793. doi:10.1038/s41598-019-51269-8
- 573 Yap MHW, Grabowska MJ, Rohrscheib C, Jeans R, Troup M, Paulk AC, van Alphen B,  
574 Shaw PJ, van Swinderen B. 2017. Oscillatory brain activity in spontaneous and  
575 induced sleep stages in flies. *Nat Commun* **8**:1815. doi:10.1038/s41467-017-  
576 02024-y
- 577
